# Supplementary material for: Chemosensory Neurons Modulate the Response to Oomycete Recognition in Caenorhabditis elegans
Source: PubMed Central journal article supplement (PMC7809619; doi:10.1016/j.celrep.2020.108604), 2021-01-12
Supplement: mmc1.pdf [file mmc1.pdf]

Cell Reports, Volume 34

## Supplemental Information

### **Chemosensory Neurons Modulate the Response to Oomycete Recognition in *Caenorhabditis elegans***

**Michael K. Fasseas, Manish Grover, Florence Drury, Clara L. Essmann, Eva Kaulich, William R. Schafer, and Michalis Barkoulas**

A

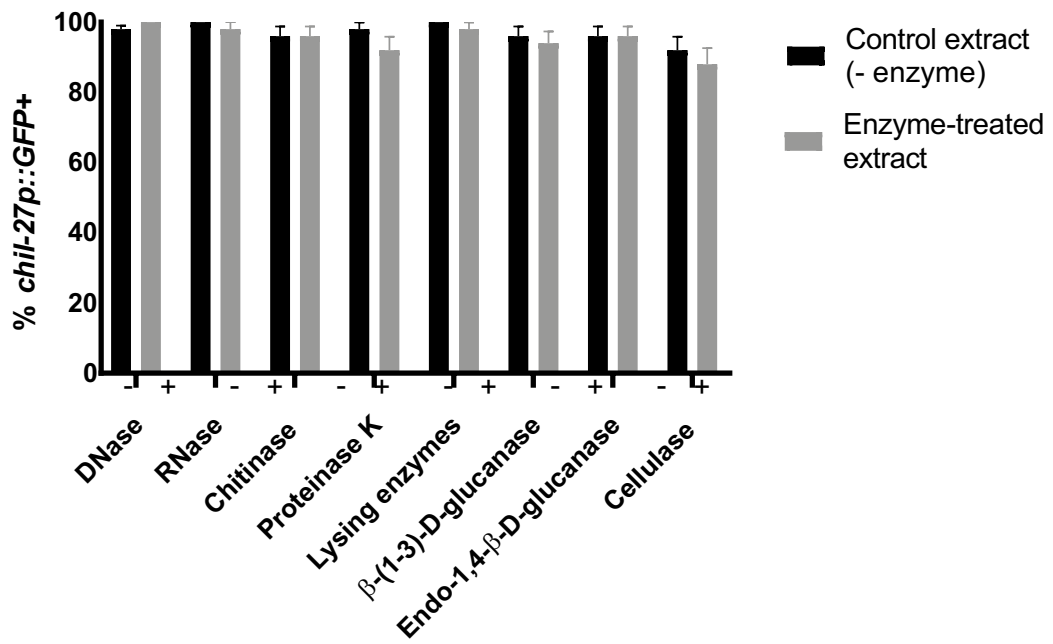

B

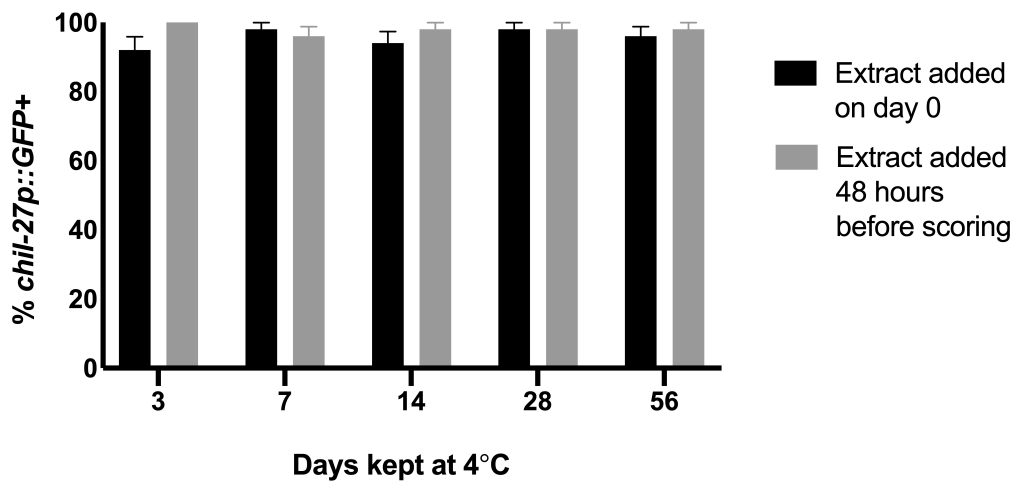

C

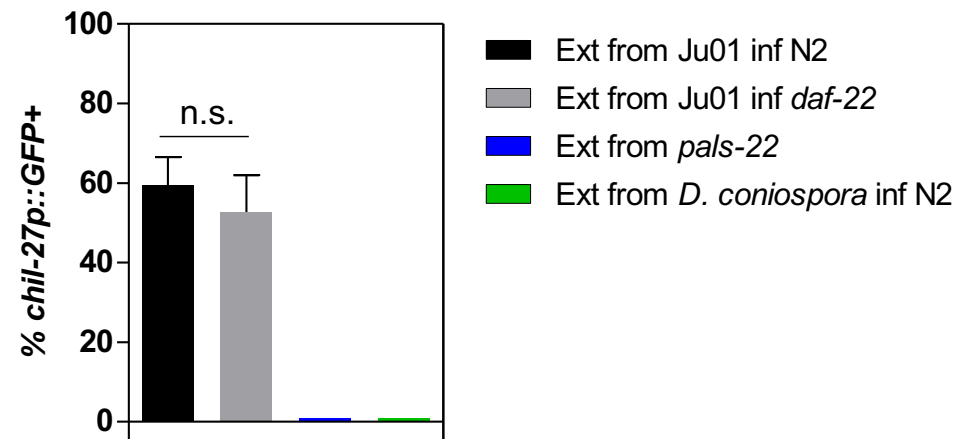

Figure S1

**Figure S1: Determining the chemical identity, stability and source of the active molecule in the pathogen extract. Related to Figure 1.**

(A) Treatment with various degrading enzymes does not reduce the potency of the extract. Each control extract was treated with the same conditions as the enzyme-treated extract, according to manufacturer's instructions to maximise enzyme activity. Lysing enzymes include DNase, RNase,  $\beta$ -glucanase, cellulase, protease, and chitinase activities. The concentration used for DNase and RNase treatment was 100  $\mu$ g/ml, while 1 mg/ml was used for rest of the enzymes. Enzyme-treated (+) and control extract (-) was added to the OP50 lawn and animals were scored 48 hours later for *chil-27p::GFP* induction (n = 50, for all treatments). (B) Incubation of extract on OP50 lawn at 4°C for up to 8 weeks does not decrease its potency to induce *chil-27p::GFP*. All plates were seeded with extract on day 0 and kept at 4°C until ready for testing. The same batch of extract was used as control and was added to the OP50 lawn 48 hours before animals were scored for *chil-27p::GFP* induction (n = 50, for all treatments). (C) Response to small-scale extracts (Ext) prepared from *M. humicola*-infected N2, *daf-22(m130)*, *D. coniospora*-infected N2 and uninfected *pals-22(icb89)* animals. No response was seen for *pals-22(-)* and *D. coniospora* and comparable response was found between N2 and *daf-22(-)* mutants. Error bars in A-C indicate standard error of the proportion.

A

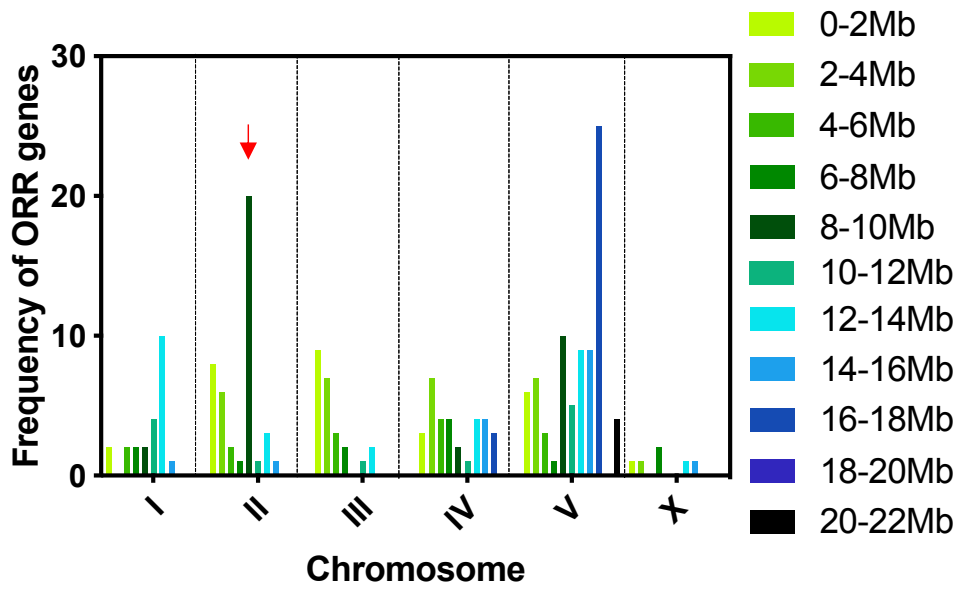

B

Extract 1 hour

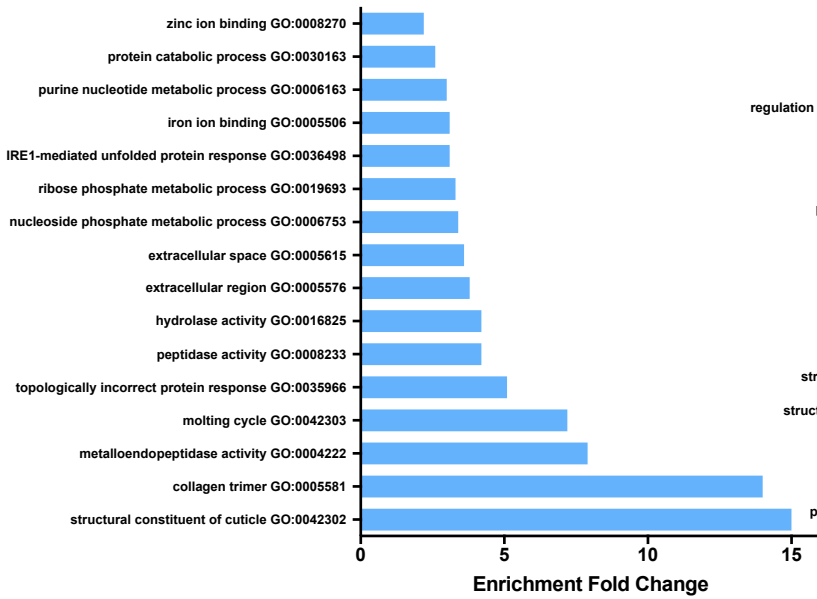

C

Infection 12 hours

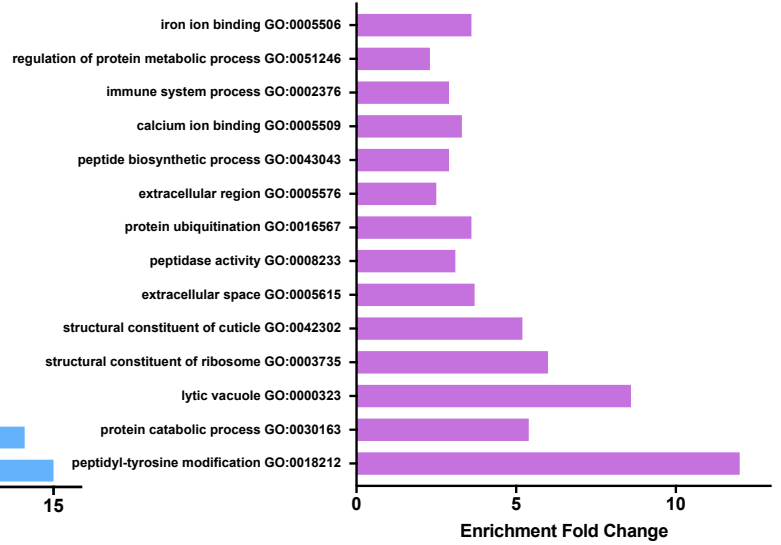

Extract 4 hours

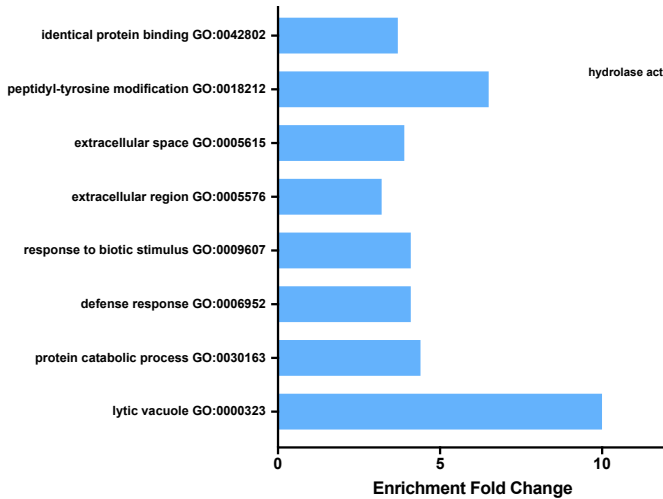

Infection 24 hours

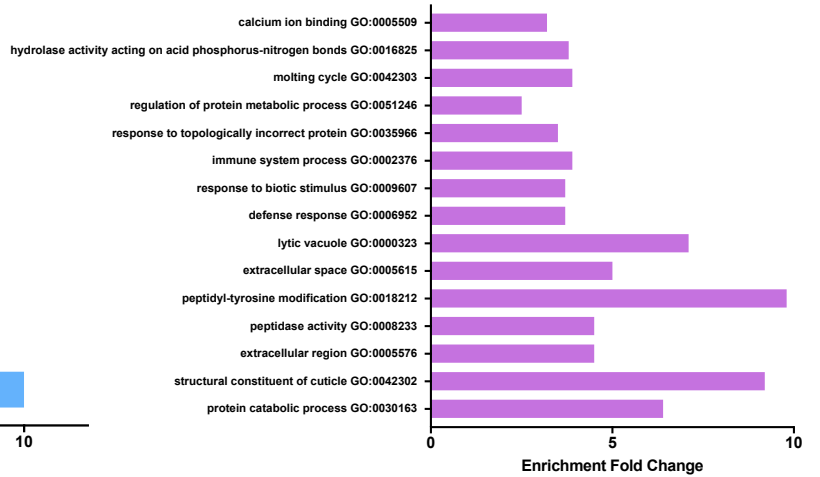

Figure S2

**Figure S2: Distribution and gene ontology enrichment analysis of upregulated ORR genes. Related to Figure 2.**

(A) Graph showing induced ORR genes per chromosome in bins of 2Mb. Genes on chromosome V are significantly overrepresented with a binomial test ( $p$  value < 0.001). Local peaks in the frequency of induced genes along the chromosomes may correspond to response clusters, for example the most prominent peak (indicated by a red arrow) on chromosome II (8-10 Mb bin) includes many *chil* genes. (B-C) Gene ontology enrichment analysis of upregulated genes identified at different timepoints. Two time points are shown for pathogen extract treatment (B) and infection (C). All datasets have been analysed using the enrichment analysis tool on Wormbase.

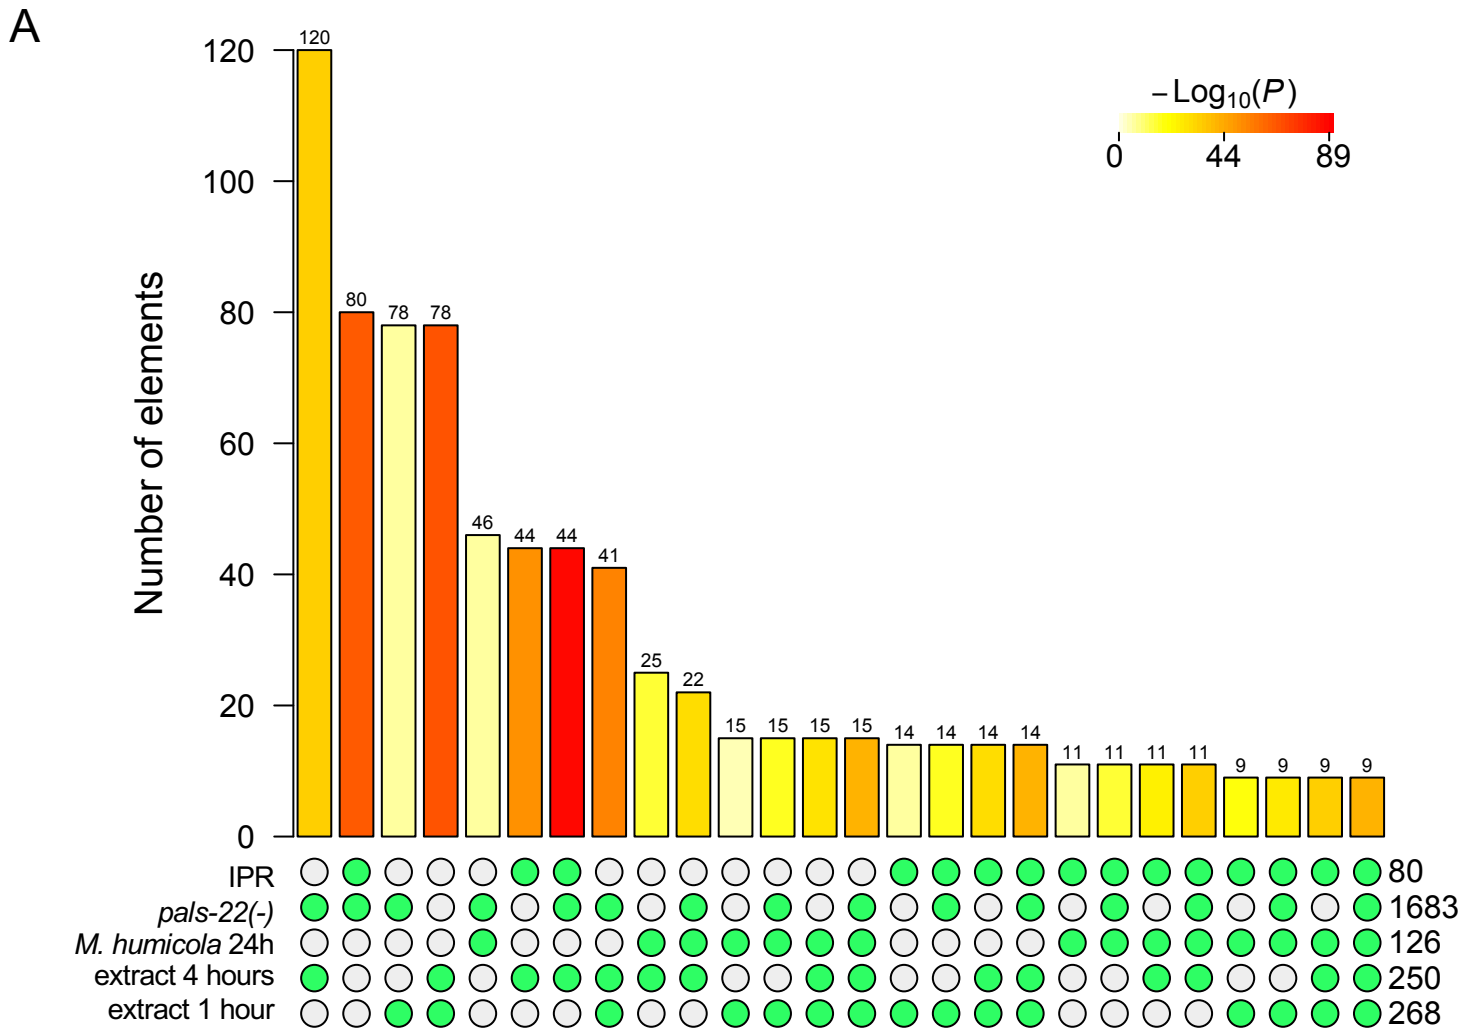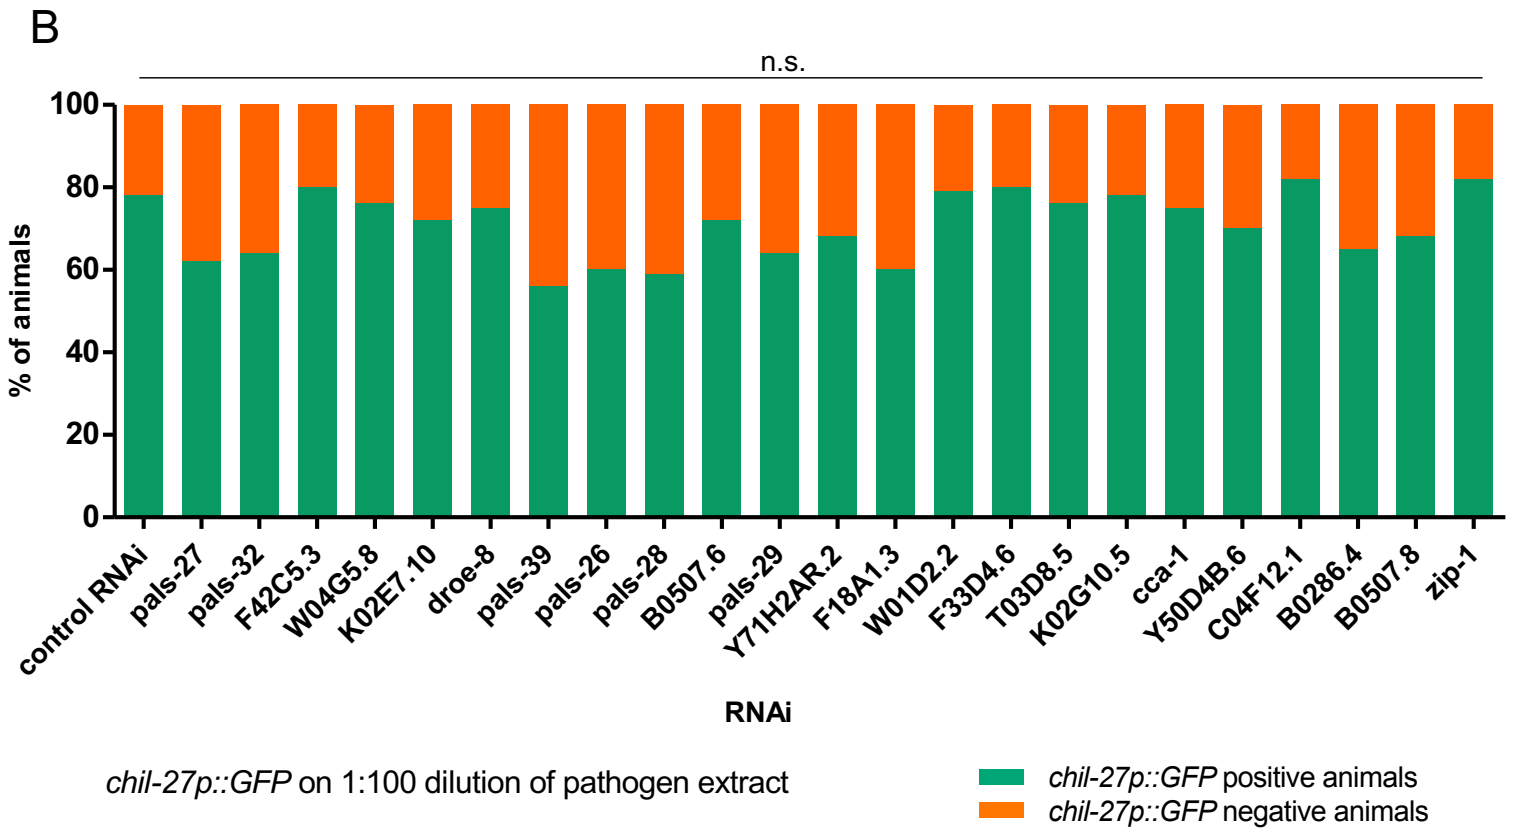

Figure S3

**Figure S3: Analysis of the transcriptional response to pathogen extract exposure. Related to Figure 3.**

(A) Overlap between different gene sets included in the GSEA analysis. Bars with numbers on top show the overlap of specific gene sets depicted in green. The size of each gene set appears on the bottom right. Key shows  $p$  value based on Fisher's exact test (Wang et al., 2015). (B) RNAi screen targeting ORR genes and studying their impact on *chil-27p::GFP* induction. No significant changes were found.

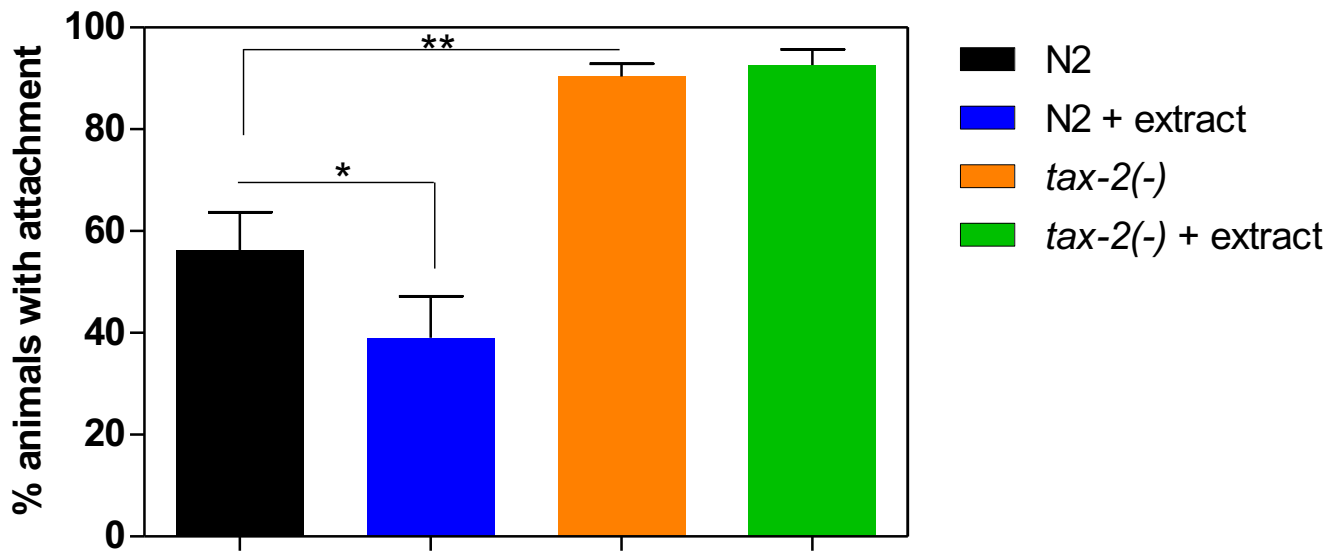

Figure S4



**Figure S4: Pathogen attachment assay for *tax-2(p691)* mutant animals. Related to Figure 5.**

(A) Percentage of N2 and *tax-2(p691)* animals with and without pretreatment with extract showing oomycete attachment after 4h exposure with the pathogen at 20°C (\*\*  $p < 0.01$  and \*  $p < 0.05$  with Chi-square test,  $n=50$ ).

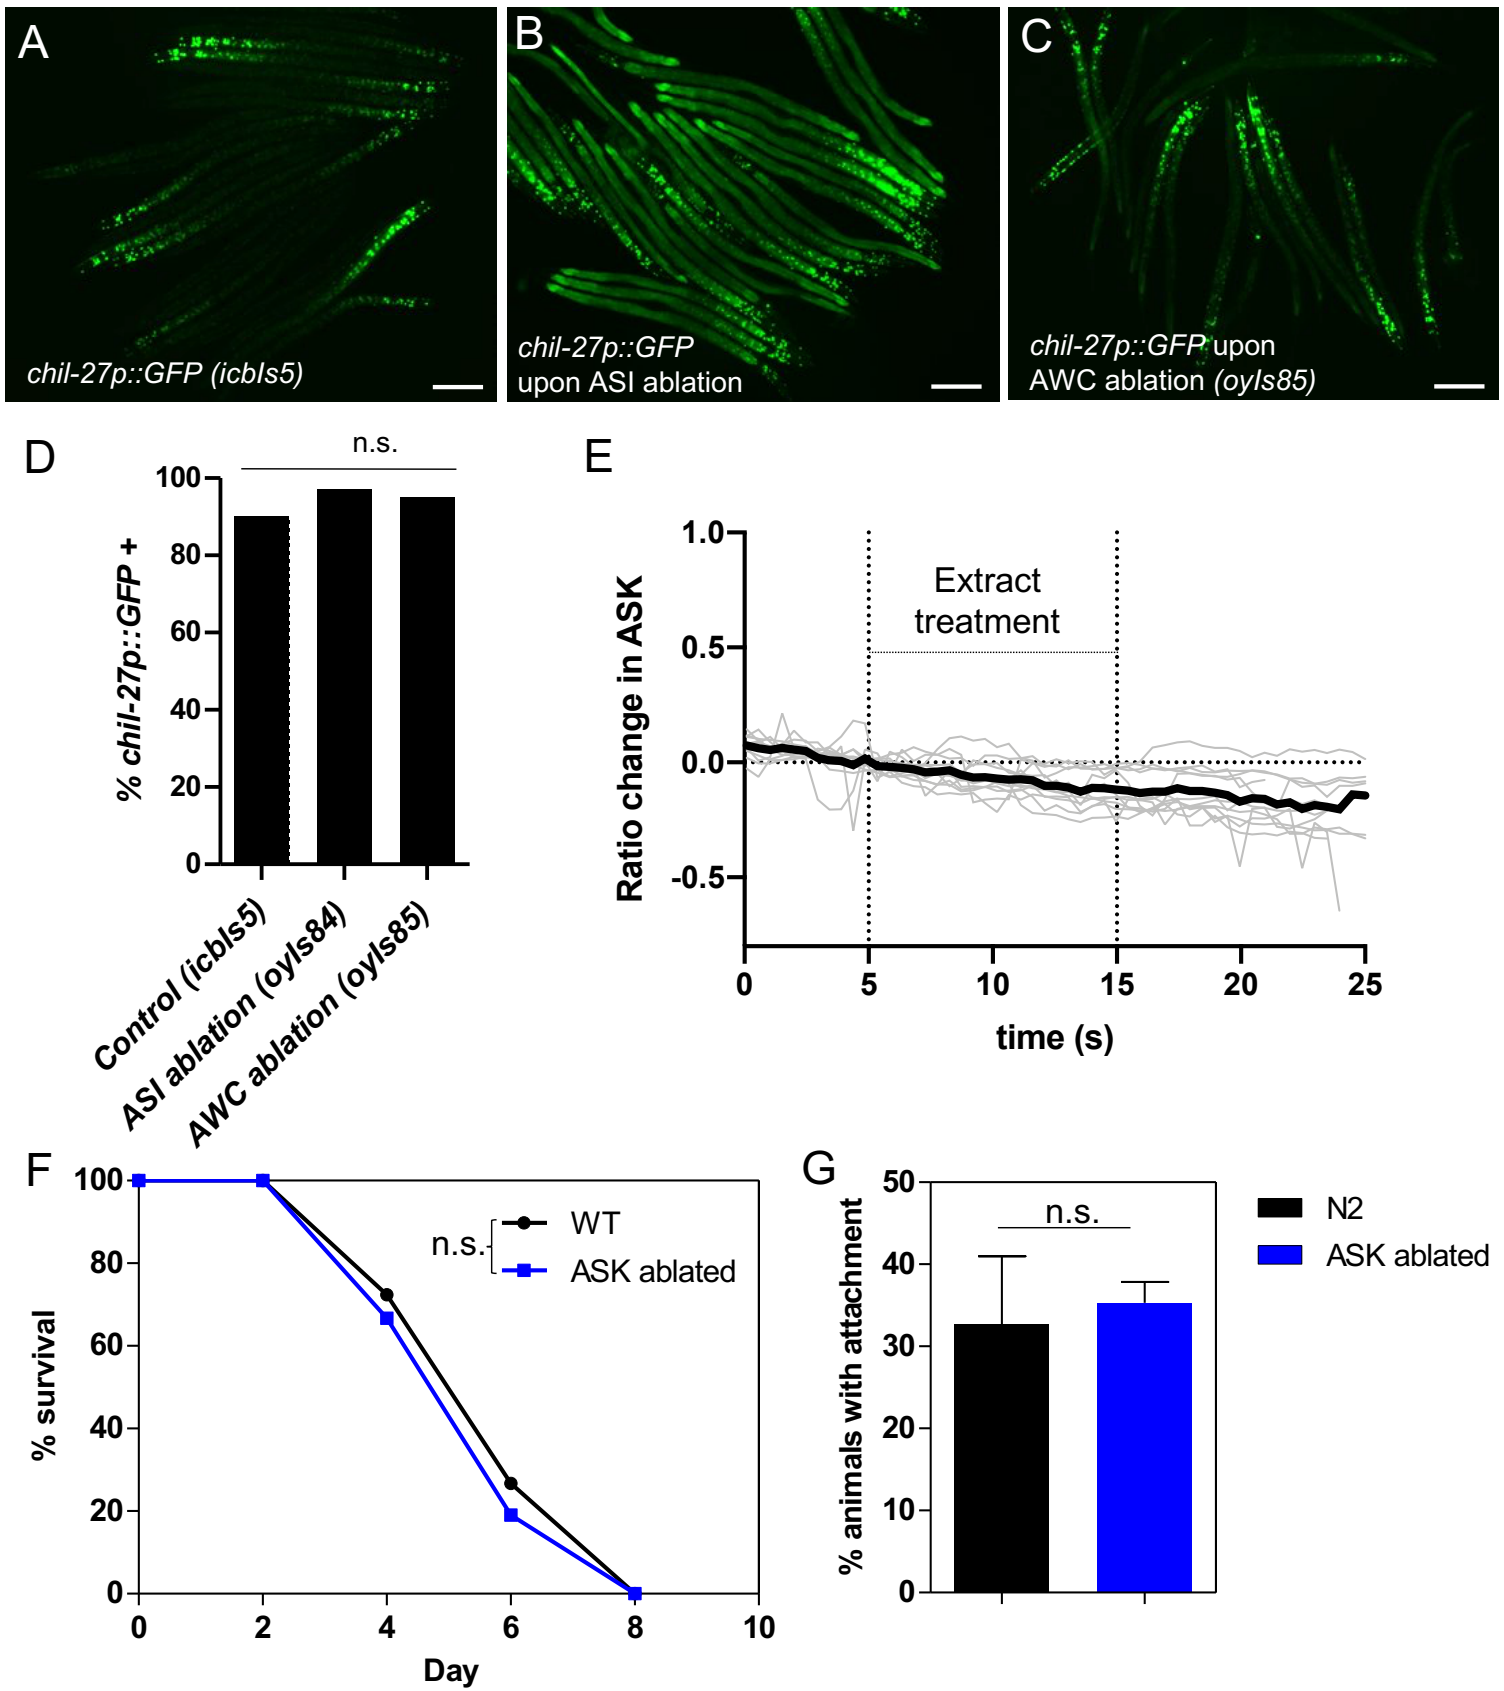

Figure S5

**Figure S5: Calcium response in ASK upon oomycete extract treatment and response to extract and infection in animals with specific neurons ablated.**

**Related to Figure 5.**

(A-D) Response to oomycete extract is not impaired in strains with ASI or AWC neurons ablated. Induction assay showing *chil-27p::GFP* expression in control carrying the transgene (A), ASI ablated (*oyIs84*) (B) and AWC ablated (*oyIs85*) strains (C) in response to treatment with 1:100 dilution of oomycete extract. Neuron ablation is performed in these strains by driving split caspase expression under *gpa-4/gcy-27* promoters in (B) and a *ceh-36* promoter in (C). Scale bar is 200  $\mu$ m. (D) Quantification of the *chil-27p::GFP* induction in response to extract treatment ( $n > 30$ ). (E) Calcium traces ( $n = 12$ ) over time and upon delivery of pathogen extract in ASK neurons using transgene *ljEx1186[sra-9p::GCaMP3::SL2-tagRFP]*. GCaMP3 and tagRFP intensities were measured as the mean pixel intensity of the 100 brightest pixels in a circular region of interest (ROI) with a 14 pixel radius. Calcium traces were computed as the change in the GCaMP3/tagRFP ratio (R) from the baseline value defined as the mean R prior to stimulus onset. Note no increase in R upon exposure to extract from time 5-15sec. (F) Survival curve of N2 and ASK ablated animals (*qrls2*) at 20°C in the presence of *M. humicola* JUo1 (n.s.,  $p > 0.05$ , log-rank test,  $n = 60$  per condition). (G) Percentage of N2 and ASK ablated animals showing oomycete attachment after 4h exposure with the pathogen at 20°C (n.s.,  $p > 0.05$ , Chi-square test,  $n = 40$ ).
